# Supplementary material for: Two-dimensional honeycomb-kagome V2X3 (X = O, S, Se) with half-metallicity, high Curie temperature, and large magnetic anisotropic energy
Source: Royal Society of Chemistry journal article supplement (doi:10.1039/d4tc01315h), 2024-01-01
Supplement: d4tc01315h1.pdf [file d4tc01315h1.pdf]

**Supporting Information for**  
**Two-dimensional honeycomb-kagome  $V_2X_3$  ( $X = O, S, Se$ ) with half-**  
**metallicity, high Curie temperature and large magnetic anisotropic**  
**energy**

Sai Ma,<sup>1,\*</sup> Xiangyan Bo,<sup>1,\*</sup> Lei Fu,<sup>1</sup> Xiaoyu Liu,<sup>1</sup> Suen Wang,<sup>1</sup> Mengxian Lan,<sup>1</sup>

Shasha Li,<sup>1</sup> Tian Huang,<sup>1,†</sup> Feng Li,<sup>1,†</sup> and Yong Pu<sup>1,†</sup>

*<sup>1</sup>School of Science & New Energy Technology Engineering Laboratory of Jiangsu  
Province, Nanjing University of Posts and Telecommunications (NJUPT), Nanjing  
210046, China*

Sai Ma and Xiangyan Bo contributed equally to this manuscript.

Corresponding Authors: lifeng@njupt.edu.cn; puyong@njupt.edu.cn

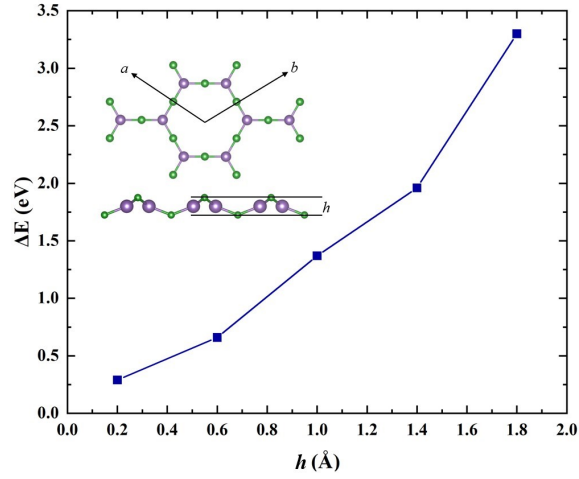

Figure S1: The variation of total energy difference,  $\Delta E = E_{(Buckled)} - E_{(Planar)}$ , as a function of buckled height  $h$ . The insets are buckled  $V_2O_3$  lattice. It can be seen that the planar structure has the lowest energy and, hence, is most stable.

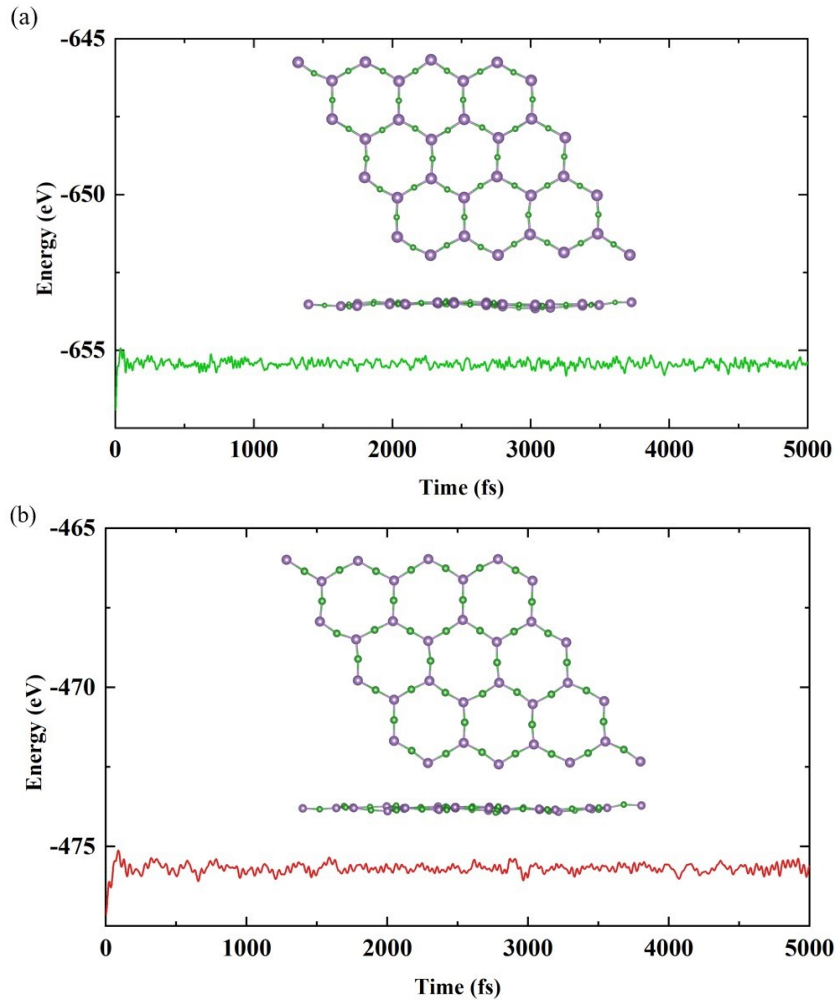

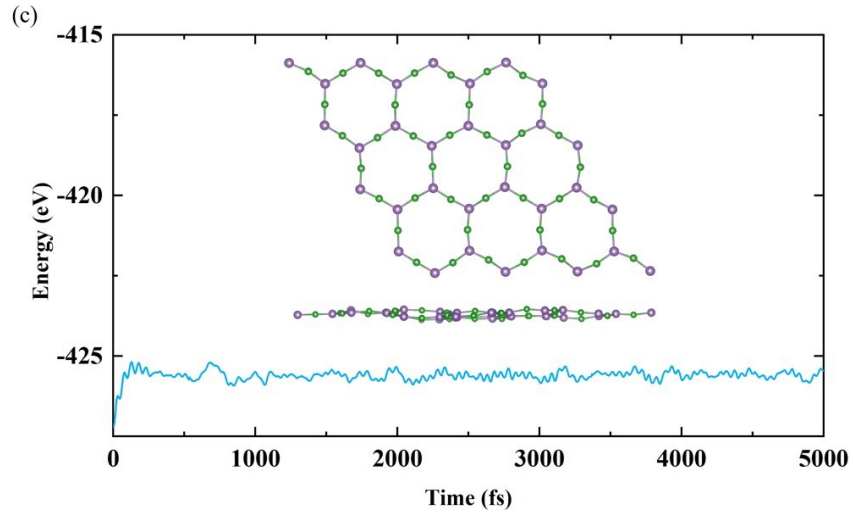

Figure S2: The evolution of total energy of the  $V_2X_3$  ( $X = O, S, Se$ ) monolayers as a function of time at 300 K.

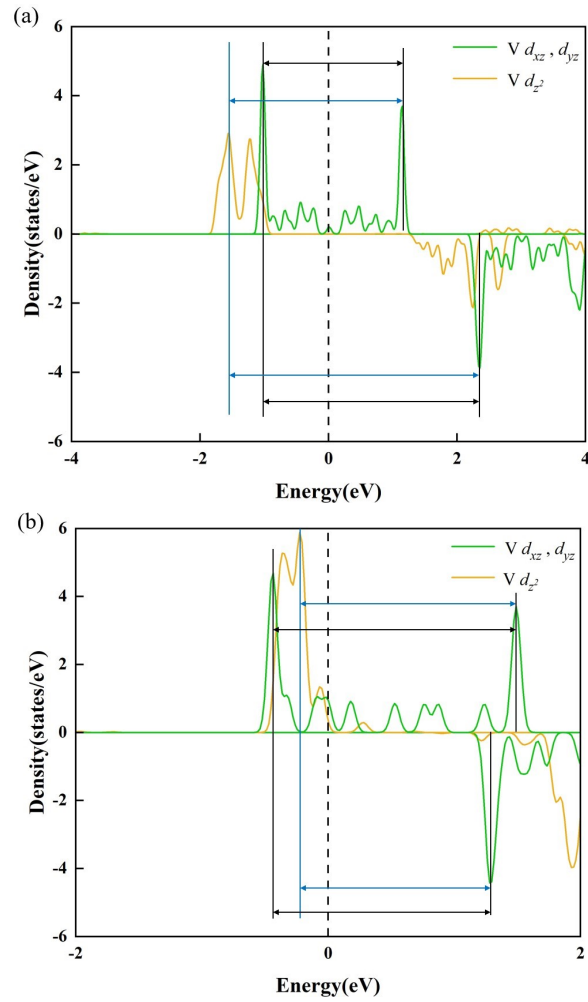

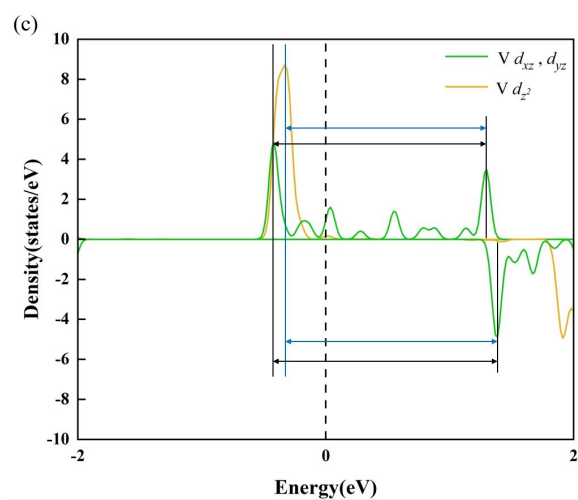

Figure S3: PDOS of V- $d_{xz}/d_{yz}$  and V- $d_z^2$  orbitals of (a)  $V_2O_3$ , (b)  $V_2S_3$ , and (c)  $V_2Se_3$ .

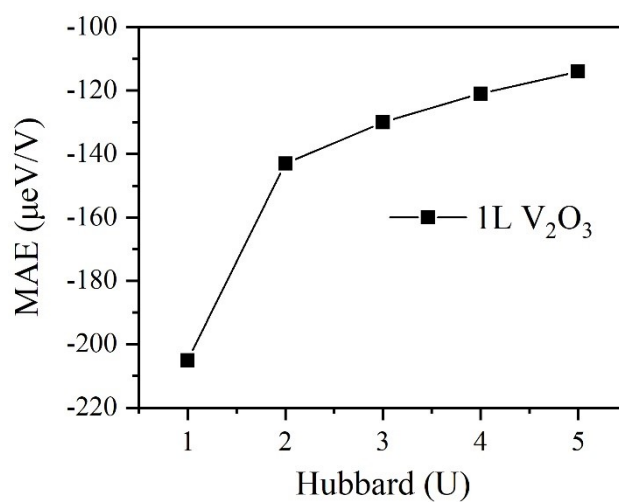

Figure S4. The energy difference between the FM state of monolayer  $V_2O_3$  along the 001 and 100 directions as a function of the Hubbard  $U$  value.
